# Supplementary material for: METTL3 Promotes the Differentiation of Goat Skeletal Muscle Satellite Cells by Regulating MEF2C mRNA Stability in a m6A-Dependent Manner
Source: MDPI journal article supplement (doi:10.3390/ijms241814115), 2023-09-14
Supplement: s1 [file s1]

## Supplementary Information

# METTL3 promotes the differentiation of goat skeletal muscle satellite cells by regulating MEF2C mRNA stability in m<sup>6</sup>A-dependent manner

Sen Zhao <sup>1,2†</sup>, Jiaxue Cao <sup>1†</sup>, Yanjin Sun <sup>1,2</sup>, Helin Zhou <sup>1,2</sup>, Qi Zhu <sup>1,2</sup>, Dinghui Dai <sup>1</sup>, Siyuan Zhan <sup>1,2</sup>, Jiazhong Guo <sup>1,2</sup>, Tao Zhong <sup>1,2</sup>, Linjie Wang <sup>1,2</sup>, Tianzeng Song <sup>3</sup>, Li Li <sup>1,\*</sup> and Hongping Zhang <sup>1,2,\*</sup>

<sup>1</sup> Farm Animal Genetic Resources Exploration and Innovation Key Laboratory of Sichuan Province, Sichuan Agricultural University, Chengdu 611130, Sichuan, China;

<sup>2</sup> Key Laboratory of Livestock and Poultry Multi-omics, Ministry of Agriculture and Rural Affairs, College of Animal and Technology, Sichuan Agricultural University, Chengdu 611130, Sichuan, China;

<sup>3</sup> Institute of Animal Science, Tibet Academy of Agricultural and Animal Husbandry Sciences, Lhasa 850009, China;

zhaosen97@126.com (S.Z.); jiaxuecao@sicau.edu.cn (J.C.); s18098064595@163.com (Y.S.);

a152136157@163.com (H.Z.); 15296542810@139.com (Q.Z.); 71317@sicau.edu.cn (D.D.);

siyuanzhan@sicau.edu.cn (S.Z.); jiazhong.guo@sicau.edu.cn (J.G.); zhongtao@sicau.edu.cn (T.Z.);

wanglinjie@sicau.edu.cn (L.W.); songtianzeng123@sina.com (T.S.);

<sup>†</sup> These authors have contributed equally to this work and share first authorship.

<sup>\*</sup> Correspondence: lily@sicau.edu.cn (L.L.) and zhp@sicau.edu.cn (H.Z.)

## Supplementary Figure

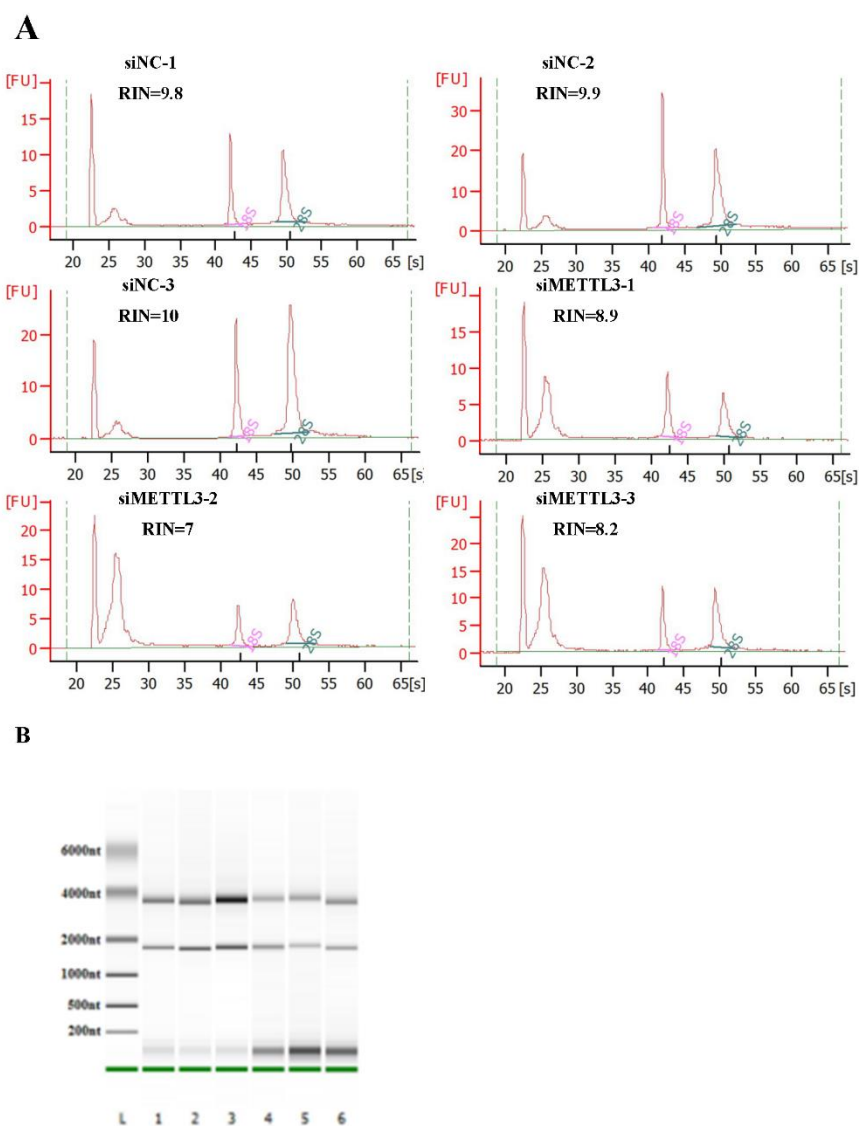

**Figure S1. RNA quality detection for mRNA-Seq.** (A) RNA quality was analyzed using an Agilent 2100 bioanalyzer, and RIN values were used to assess integrity. (B) Gel electrophoresis of total RNA.

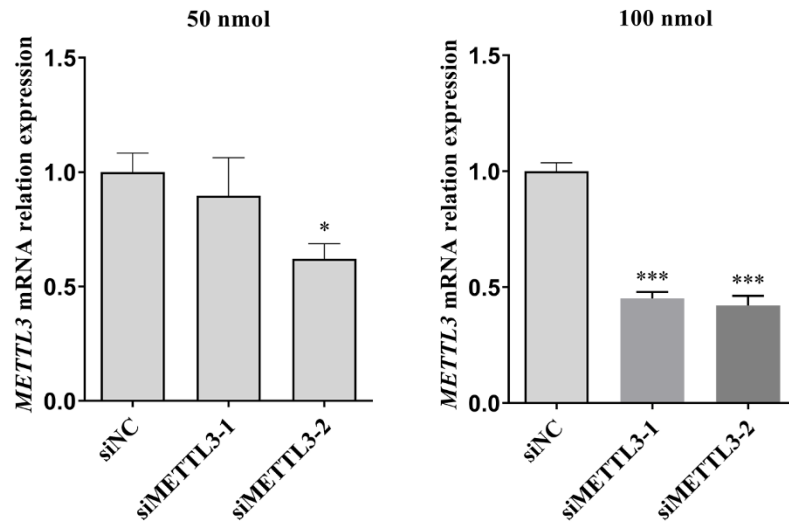

**Figure S2. Determine the optimal transfection concentration of siMETTL3.** The knockdown efficiency of different siMETTL3 was verified by qPCR analysis in MuSCs. Mean values  $\pm$  SEM, \* $p < 0.05$ , \*\*\* $p < 0.001$ .

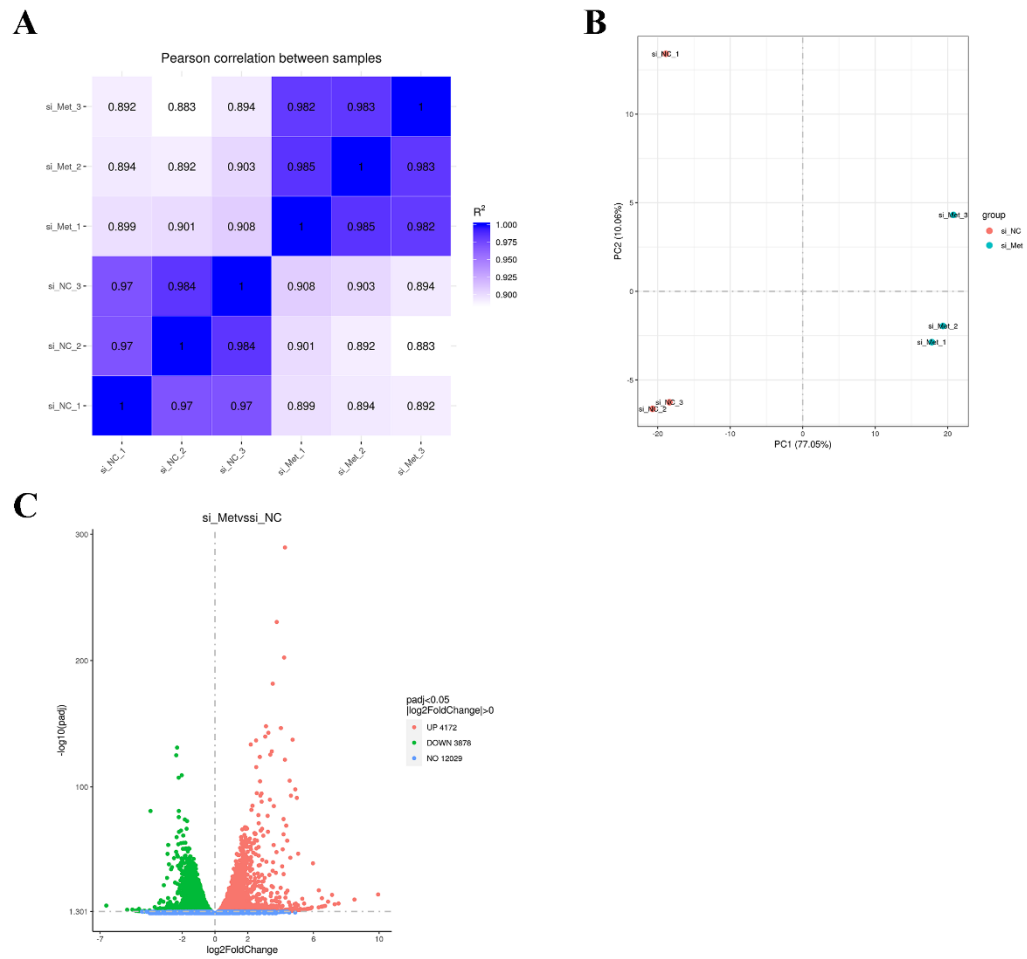

**Figure S3. Identification of DEGs between siNC and siMETTL3-transfected cells.** (A) Heat map of correlation (B) Results of principal component analysis. (C) Volcano map of DEGs.

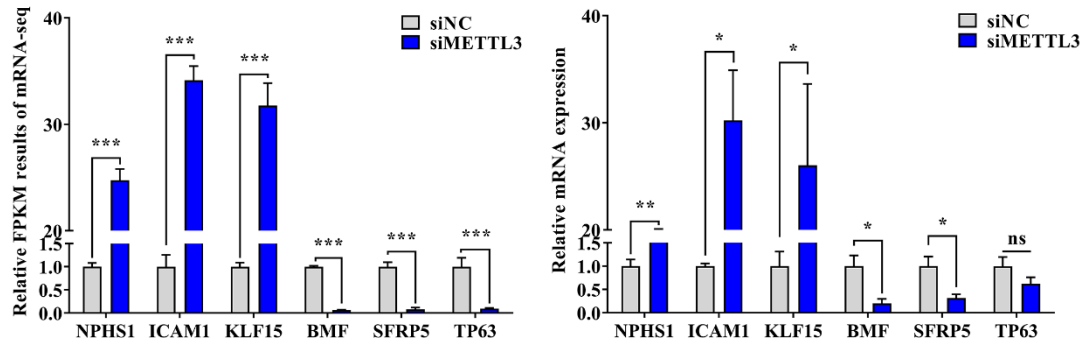

**Figure S4. Verify mRNA-seq results.** qPCR was used to validate some randomly selected DEGs (up and down-regulated) from mRNA-seq. Mean values  $\pm$  SEM, \* $p$  < 0.05, \*\* $p$  < 0.01, \*\*\* $p$  < 0.001, ns, no significance.

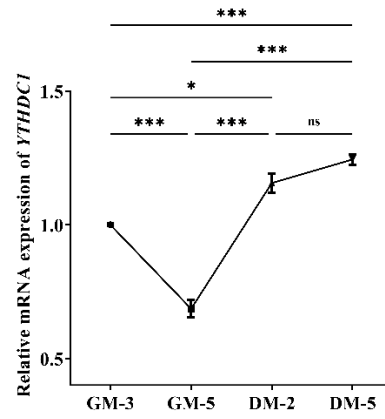

**Figure S5. Expression patterns of MEF2C in MuSCs.** qPCR analysis of MEF2C expression during the GM and DM of MuSCs. Mean values  $\pm$  SEM, \* $p < 0.05$ , \*\*\* $p < 0.001$ , ns, no significance.

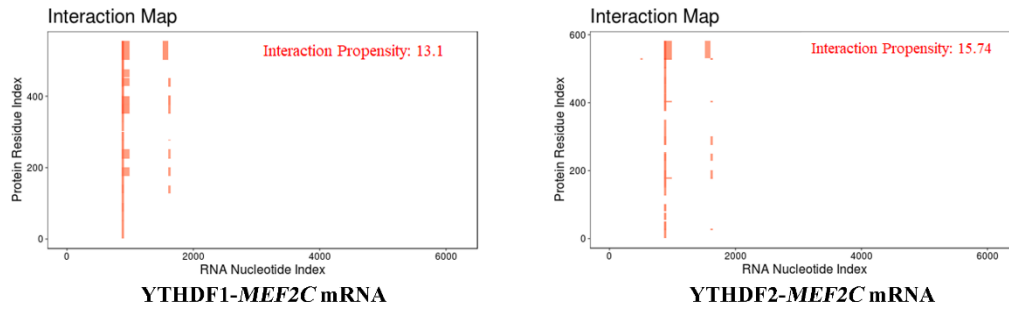

**Figure S6. catRAPID Omics v2.0 predicted the binding potential of YTHDF1 and DF2 to *MEF2C* mRNA.**  
Interaction Propensity represents the probability of protein and RNA interaction.

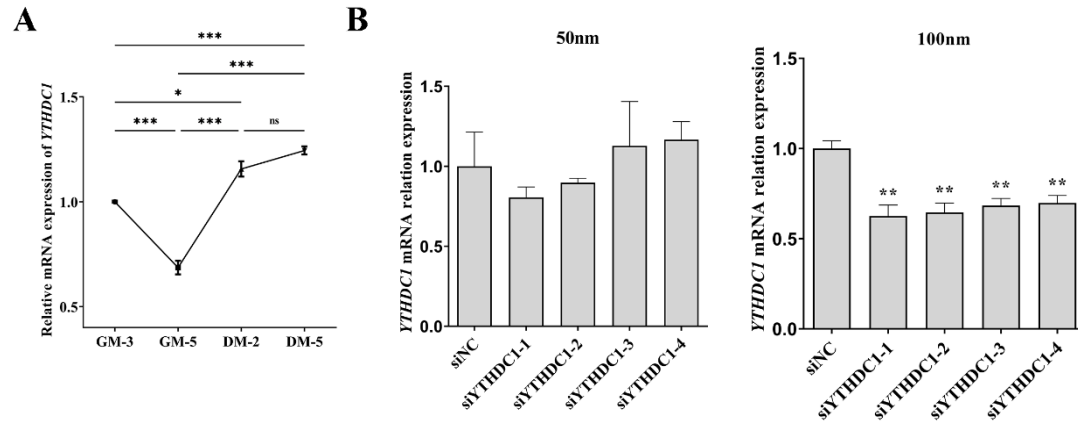

**Figure S7. The expression of YTHDC1 and the optimal transfection concentration of siYTHDC1 were determined in MuSCs.** (A) qPCR analysis of YTHDC1 expression during the GM and DM of MuSCs. The knockdown efficiency of different siYTHDC1 was verified by qPCR analysis in MuSCs. Mean values  $\pm$  SEM, \* $p < 0.05$ , \*\* $p < 0.01$ , \*\*\* $p < 0.001$ , ns, no significance.



**Table S1.** Details for siRNA sequence.

| siRNA Name | Sequence            |
|------------|---------------------|
| siMETTL3   | CCCGGTTCAAGCAAAGATA |
| siYTHDC1-1 | CGAGATAGAGGACGTGATA |
| siYTHDC1-2 | CGTGATAGAGAAAGAGAAA |
| siYTHDC1-3 | CCACATGAAGCAAGATACA |

**Table S2.** Sequences of primers.

| Target genes | Forward primer (5'-3')                             | Reverse primer (5'-3')                         |
|--------------|----------------------------------------------------|------------------------------------------------|
| CDS cloning  |                                                    |                                                |
| MEF2C-CDS    | ATGGGGAGAAAAAAGATTCAGAT<br>TA                      | TGTTGCCCATCCTTCAGAGAG                          |
|              | Xho1-F:                                            | HindIII-R:                                     |
| HR-MEF2C     | CTACCGGACTCAGATCTCGAGATG<br>GGGAGAAAAAAGATTCAGATTA | CGACTGCAGAATTCGAAGCTTTGTTGCC<br>CATCCTTCAGAGAG |
| RT-qPCR      |                                                    |                                                |
| METTL3       | TGTGCAACCCAACTGGATCA                               | ATCTTTGCTTGAACCGGGCA                           |
| MEF2C        | ATCCTGA TGCAGACGATTCAG                             | GGTGAACAGCACACAATCTT                           |
| GAPDH        | GCAAGTTCCACGGCACAG                                 | GGTTCACGCCCATCACAA                             |
| MyoD         | GTGCAAACGCAAGACGACTA                               | GCTGGTTTGGGTTGCTAGAC                           |
| MyoG         | GGACCCTACAGATGCCCACA                               | TTGGTATGGTTTCATCTGGG                           |
| MyHC         | CCACATCTTCTCCATCTCTG                               | GGTTCCTCCTTCTTCTTCTC                           |
| MEF2C-1728   | ATTGGACTCACCAGACCTT                                | TCATGTTGCCCATCCTTC                             |
| YTHDC1       | TGGACGTGATGGACAGGA                                 | TTGATCGGGGCTGAGAATGC                           |

**Table S3.** Information of dual-luciferase primers.

| Target genes  | Forward primer (5'-3')                                     | Reverse primer (5'-3')                                      |
|---------------|------------------------------------------------------------|-------------------------------------------------------------|
| HR-MEF2C-1728 | Xho1-F:<br>AATTCTAGGCGATCGCTCGAGAT<br>TGGACTCACCAGACCTTCGC | Not1-R:<br>ATTTTATTGCGGCCAGCGGCCGCTC<br>ATGTTGCCCATCCTTCAGA |

**Table S4.** Quality summary of mRNA-seq data.

| Sample   | raw_reads | clean_reads | clean_bases | Q20   | Q30   | GC_pct |
|----------|-----------|-------------|-------------|-------|-------|--------|
| si_NC_1  | 45303764  | 40764966    | 6.11G       | 97.75 | 93.89 | 52.56  |
| si_NC_2  | 45943492  | 43164328    | 6.47G       | 97.75 | 93.73 | 51.36  |
| si_NC_3  | 41434124  | 39277494    | 5.89G       | 97.86 | 93.92 | 51.33  |
| si_Met_1 | 42041002  | 38468530    | 5.77G       | 97.75 | 93.7  | 49     |
| si_Met_2 | 44244506  | 40880020    | 6.13G       | 97.12 | 92.39 | 48.61  |
| si_Met_3 | 42134598  | 38663824    | 5.8G        | 97.96 | 94.09 | 48.62  |

**Table S5.** The genomic mapping results of clean reads.

| Sample   | total_reads | total_map(%)      | unique_map(%)     | multi_map(%)     |
|----------|-------------|-------------------|-------------------|------------------|
| si_NC_1  | 40764966    | 39546334 (97.01%) | 37229398 (91.33%) | 2316936 (5.68%)  |
| si_NC_2  | 43164328    | 41942797 (97.17%) | 39230233 (90.89%) | 2712564 (6.28%)  |
| si_NC_3  | 39277494    | 38108689 (97.02%) | 33813297 (86.09%) | 4295392 (10.94%) |
| si_Met_1 | 38468530    | 37384668 (97.18%) | 35831944 (93.15%) | 1552724 (4.04%)  |
| si_Met_2 | 40880020    | 39446827 (96.49%) | 37678609 (92.17%) | 1768218 (4.33%)  |
| si_Met_3 | 38663824    | 37689485 (97.48%) | 36025393 (93.18%) | 1664092 (4.3%)   |
